# Supplementary material for: A Non-Toxic Concentration of Telomerase Inhibitor BIBR1532 Fails to Reduce TERT Expression in a Feeder-Free Induced Pluripotent Stem Cell Model of Human Motor Neurogenesis
Source: PubMed Central journal article supplement (PMC8005146; doi:10.3390/ijms22063256), 2021-03-23
Supplement: ijms-22-03256-s001.pdf [file ijms-22-03256-s001.pdf]

# Supplementary Materials

## Supplementary Tables

**Table S1.** N2-B27.

|                                                                                                    | N2                                   |                                       | B27                                                                    |
|----------------------------------------------------------------------------------------------------|--------------------------------------|---------------------------------------|------------------------------------------------------------------------|
| DMEM-F12 GlutaMAX                                                                                  | Thermo Fisher Scientific<br>10565018 | Neurobasal Media                      | Thermo Fisher Scientific 12348017                                      |
| 100 $\mu$ M 2-mercaptethanol                                                                       | Thermo Fisher Scientific<br>21985023 | B27 supplement                        | Thermo Fisher Scientific 17504044                                      |
| 100 $\mu$ M MEM-non essential amino acids                                                          | Thermo Fisher Scientific<br>11140050 | 2 mM<br>L-glutamine or 1X<br>Glutamax | Thermo Fisher Scientific 25030024<br>Thermo Fisher Scientific 35050061 |
| N2 supplement                                                                                      | Thermo Fisher Scientific<br>17502048 |                                       |                                                                        |
| 5 $\mu$ g/mL Human Insulin Solution                                                                | Sigma-Aldrich I9278                  |                                       |                                                                        |
| Penicillin (50 U/mL)/ Streptomycin (50 $\mu$ g/mL) antibiotics (Thermo Fisher Scientific 15070063) |                                      |                                       |                                                                        |

**Table S2.** Antibodies used in this study.

| Antibody (species)                        | Reference Dilution | Company                    | Application         |
|-------------------------------------------|--------------------|----------------------------|---------------------|
| OCT4 (Goat)                               | 1:400              | Abcam (Ab27985)            | Immunocytochemistry |
| Cleaved CASP3 (Rabbit)                    | 1:400              | Cell Signalling Technology | Immunocytochemistry |
| Anti-Rabbit IgG, Alexa Fluor 647 (Donkey) | 1:5000             | Invitrogen (A31573)        | Immunocytochemistry |
| Anti-Goat IgG, Alexa Fluor 488 (Donkey)   | 1:5000             | Invitrogen (A11055)        | Immunocytochemistry |
| Alpha Tubulin (Mouse)                     | 1:1000             | Sigma-Aldrich (T5168)      | Western blotting    |
| TERT (Rabbit)                             | 1:1000             | Abcam (Ab32020)            | Western blotting    |
| IRDye® 800CW anti-Mouse IgG (Goat)        | 1:10000            | LI-COR (926-32210)         | Western Blotting    |
| IRDye® 680RD anti-Rabbit IgG (Goat)       | 1:10000            | LI-COR (926-68071)         | Western Blotting    |

**Table S3.** qRT-PCR primer sequences.

| Gene          | Forward Primer Sequence (5'-3') | Reverse Primer Sequence (5'-3') |                       |
|---------------|---------------------------------|---------------------------------|-----------------------|
| <i>GAPDH</i>  | ATGACATCAAGAAGGTGGTG            | CATACCAGGAAATGAGCTTG            |                       |
| <i>NKX6.1</i> | GTTTGGCCTATTCGTTGGGGA           | GTGCTTCTTCCTCCACTTGGT           |                       |
| <i>OCT4</i>   | H_POU5F1_1                      | H_POU5F1_1                      | Sigma                 |
| <i>SOX2</i>   | H_SOX2_1                        | H_SOX2_1                        | Sigma                 |
| <i>TERT</i>   | TGTGCACCAACATCTACAAG            | GCGTTCTTGGCTTTCAGGAT            | Vera et al., 2016 [1] |
| <i>TUBB3</i>  | H_TUBB3_1                       | H_TUBB3_1                       | Sigma                 |

## Supplementary Materials and Methods

### Western Blotting

Cell pellets were lysed in RIPA buffer (Thermofisher 89900) + 1 $\times$  Halt Protease and Phosphatase Inhibitor Cocktail (Thermofisher 78444), sonicated at 4 °C and centrifuged (20,000 $\times$  g; 4 °C; 15 min). The supernatant protein extract was obtained, and concentration determined using the Pierce BCA protein assay kit (Thermofisher 23225) Protein lysates were separated on a NuPAGE 4–12% Bis-Tris protein gel (Thermofisher NP0335BOX) and then transferred onto nitrocellulose membranes. Membranes were blocked at room temperature for 1 hour in 5% milk in PBST. The membrane was incubated in 5% milk in PBST + primary antibody at 4 °C overnight followed by incubation in PBST + 1:10,000 secondary antibody (LICOR IRDye) (room temperature, 1 hr). Membranes were imaged

using the LI-COR Odyssey CLx. Primary antibodies and their concentrations are listed in Table S2.

#### References for supplementary material

1. Vera, E.; Bosco, N.; Studer, L. Generating Late-Onset Human iPSC-Based Disease Models by Inducing Neuronal Age-Related Phenotypes through Telomerase Manipulation. *Cell Rep.* **2016**, *17*, 1184-1192, doi:10.1016/j.celrep.2016.09.062.
2. Hall, C.E.; Yao, Z.; Choi, M.; Tyzack, G.E.; Serio, A.; Luisier, R.; Harley, J.; Preza, E.; Arber, C.; Crisp, S.J., et al. Progressive Motor Neuron Pathology and the Role of Astrocytes in a Human Stem Cell Model of VCP-Related ALS. *Cell reports* **2017**, *19*, 1739-1749, doi:10.1016/j.celrep.2017.05.024.

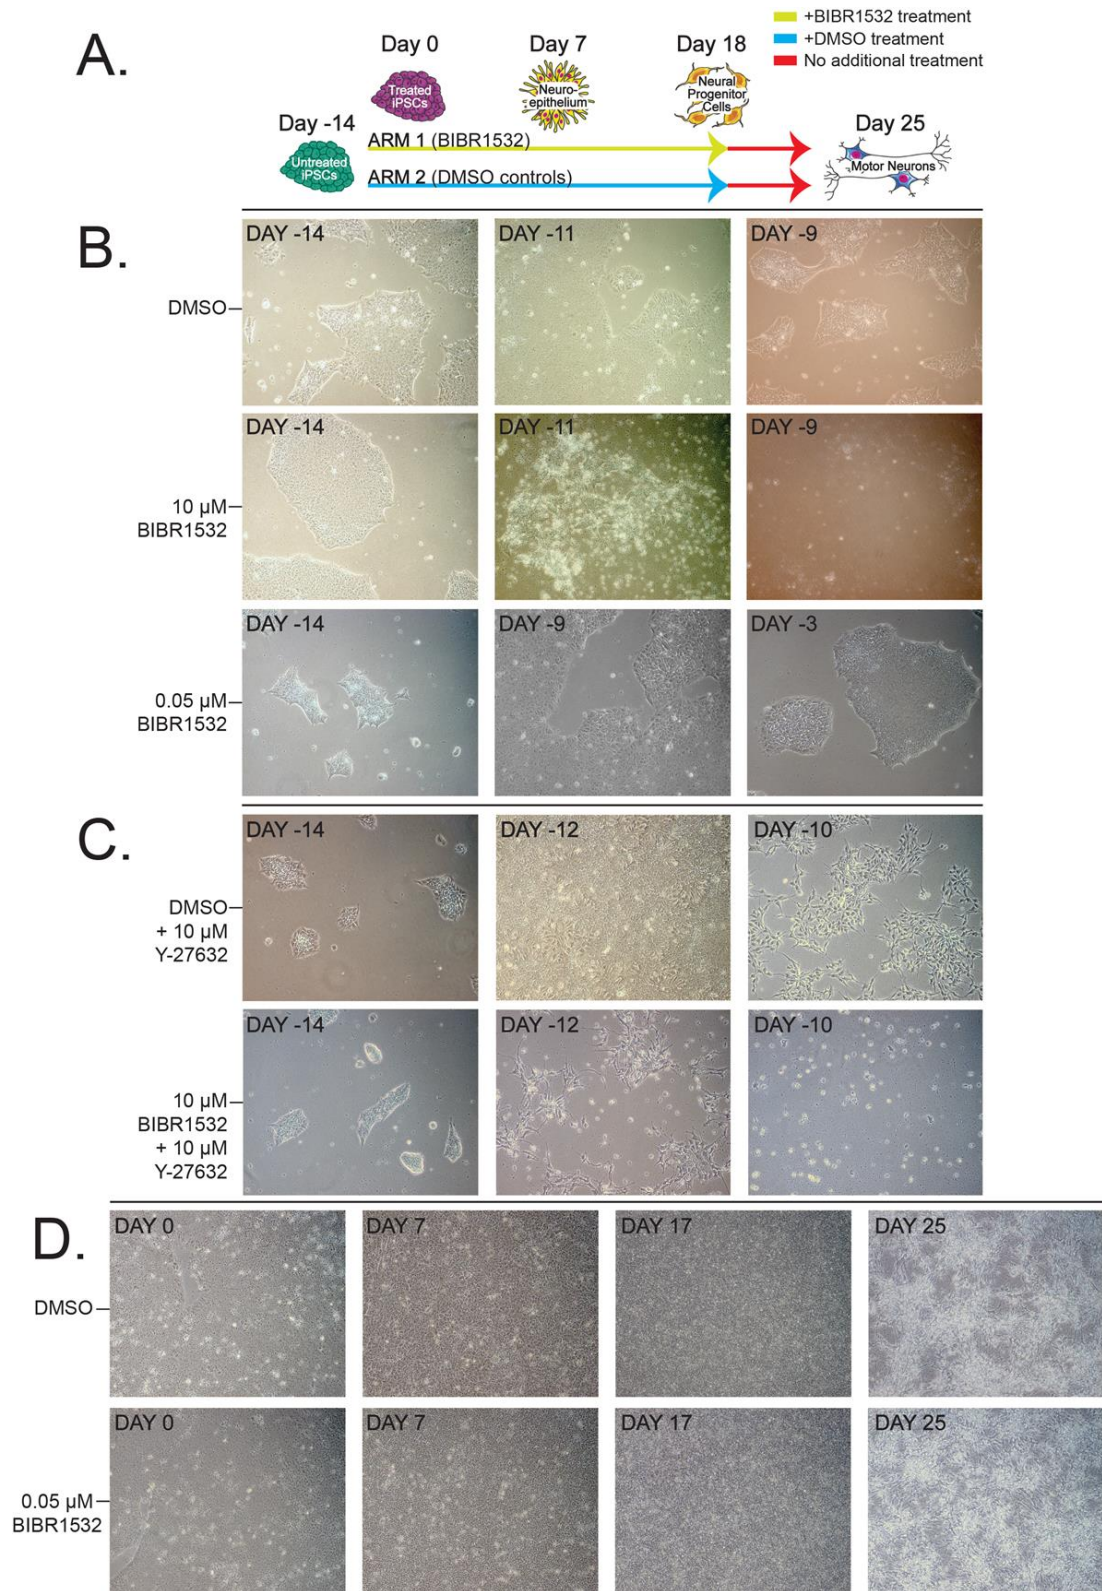

**Figure S1.** (related to Figure 1): 10  $\mu$ M BIBR1532 is cytotoxic to feeder-free iPSCs, not rescued by ROCK inhibition. 0.05  $\mu$ M BIBR1532 allows continued iPSC culture and is compatible with directed differentiation to MNs. (A) Schematic depicting experimental paradigm for BIBR1532 treatment and DMSO controls. Figure templates adapted from Hall et al., 2017 [2]. (B) Representative phase contrast images of DMSO control iPSCs, and iPSCs treated with 10  $\mu$ M and 0.05  $\mu$ M BIBR1532, across time. (C) Representative phase contrast images of DMSO control or 10  $\mu$ M BIBR1532 iPSCs co-treated with 10  $\mu$ M Y-27632. Note that treatment with Y-27632 changes iPSC morphology. (D) Representative phase contrast images of DMSO control and 0.05  $\mu$ M BIBR1532 treated cells throughout directed differentiation to MNs.

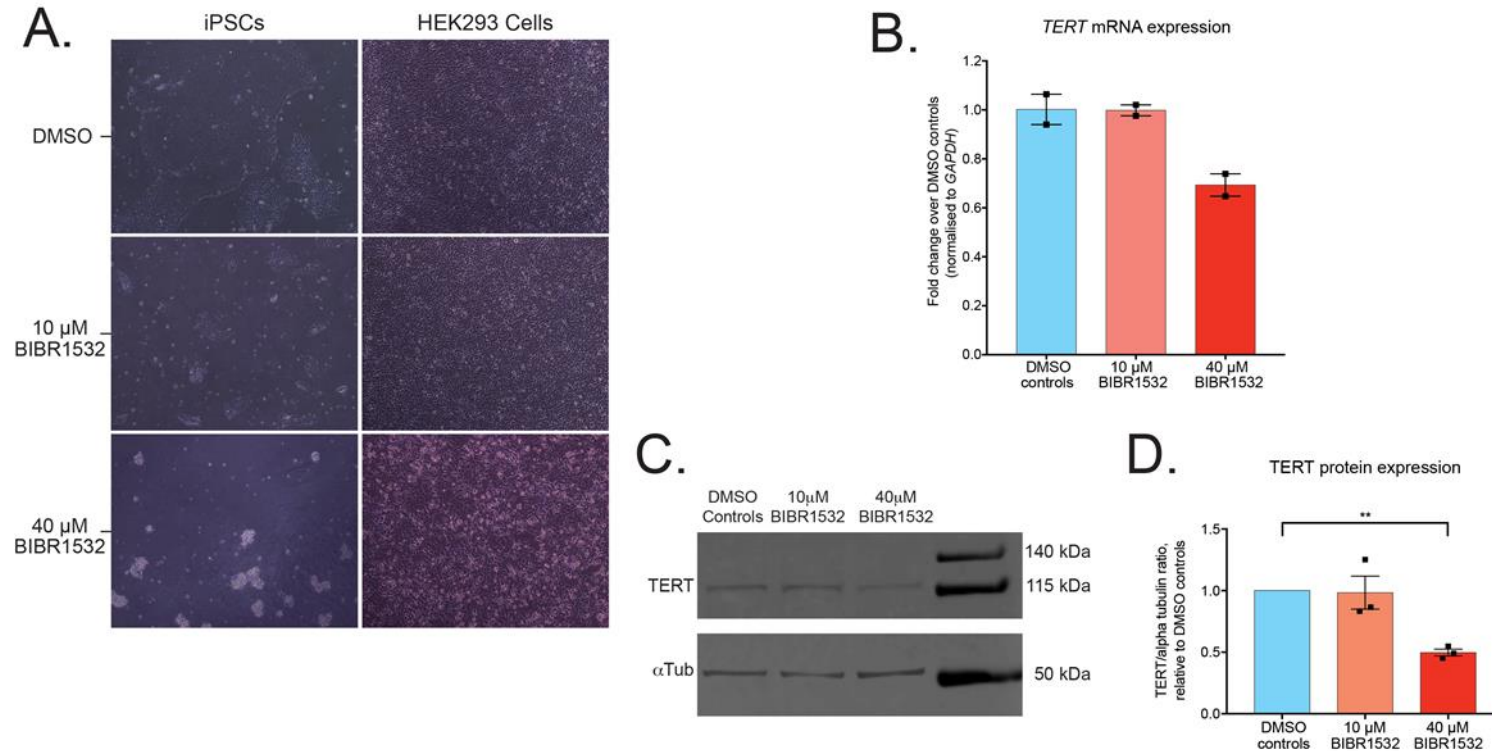

**Figure S2.** (related to Figure 1): 40  $\mu$ M and 10  $\mu$ M BIBR1532 is cytotoxic to feeder-free iPSCs, but not HEK293 cells. 40  $\mu$ M BIBR1532 reduces TERT expression in HEK293 cells. **(A)** Representative phase contrast images of 40  $\mu$ M and 10  $\mu$ M treated iPSCs and HEK293 cells, alongside DMSO controls at 48 hours. **(B)** qRT-PCR analysis of expression of *TERT* in HEK293 cells after 48 hours of 40  $\mu$ M and 10  $\mu$ M BIBR1532 treatment, normalised to *GAPDH* expression, relative to DMSO controls.  $n=2$  (represented as datapoints). Data presented as mean  $\pm$  S.E.M. **(C)** Representative western blot for TERT and alpha tubulin in HEK293 cells after 48 hours of 40  $\mu$ M and 10  $\mu$ M BIBR1532 treatment. **(D)** Quantitative densitometry analysis of TERT protein expression, normalised to alpha tubulin protein expression, relative to DMSO controls.  $n=3$  (represented as datapoints). Data presented as mean  $\pm$  S.E.M. One-way ANOVA, with Tukey's test for multiple comparisons. \*\*  $p < 0.01$ .

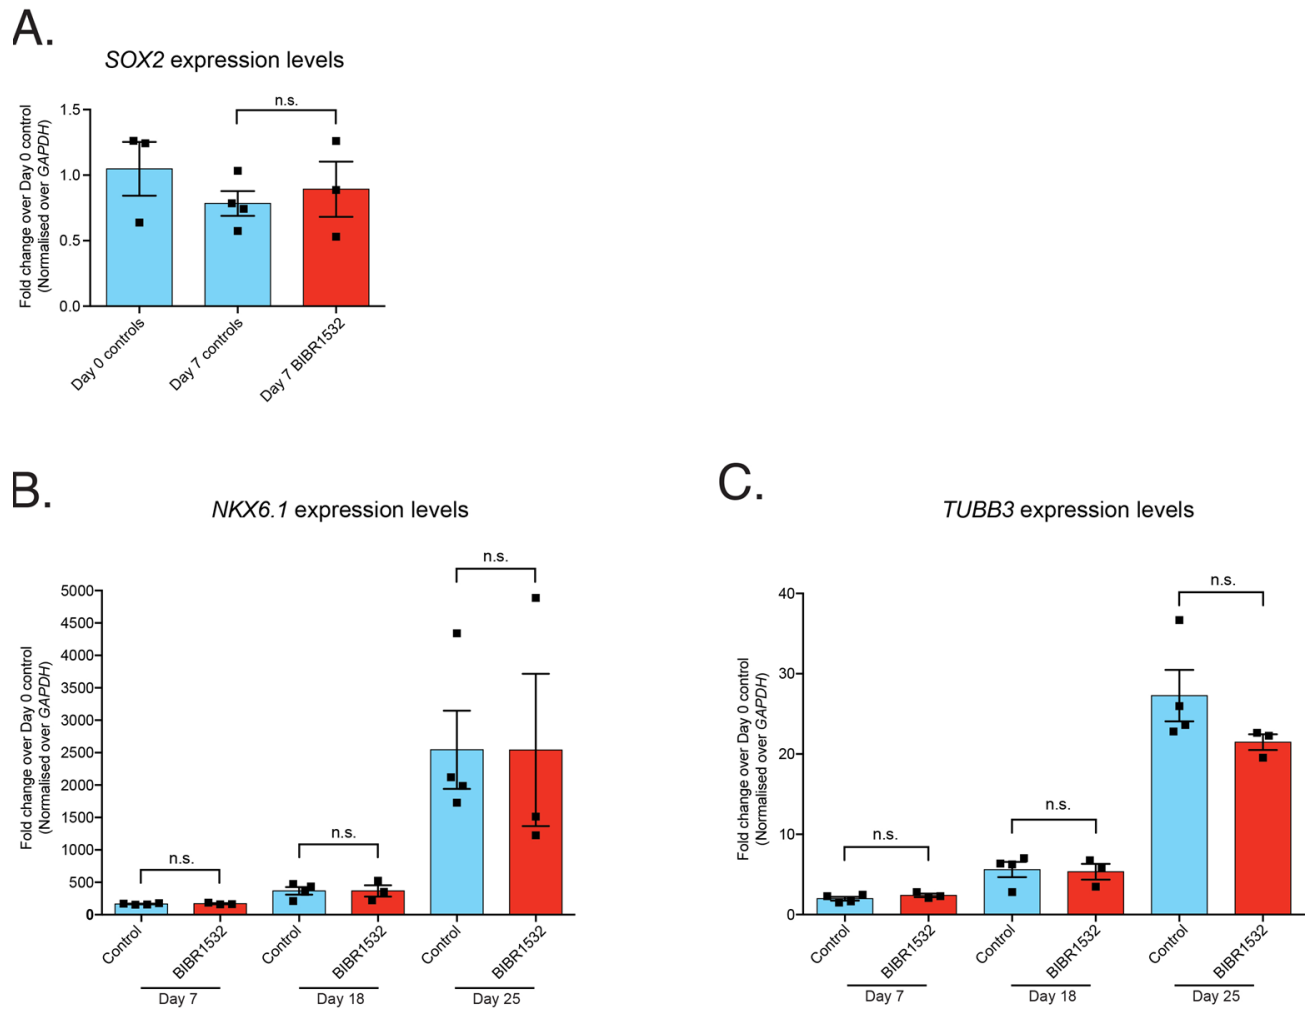

**Figure S3.** (related to Figure 1): 0.05  $\mu\text{M}$  BIBR1532 treatment has no effect on key developmental markers of iPSC-MN directed differentiation. **(A)** qRT-PCR analysis of expression of *SOX2* in cells treated with 0.05  $\mu\text{M}$  BIBR1532 or DMSO at day 0 and day 7 of iPSC-MN differentiation, normalised to *GAPDH* expression, relative to day 0 control iPSCs. An unpaired t-test of treated/untreated day 7 cells revealed no significant difference in *SOX2* mRNA expression with treatment. **(B)** qRT-PCR analysis of *NKX6.1* expression throughout MN differentiation, in cells treated with 0.05  $\mu\text{M}$  BIBR1532 or DMSO, normalised over *GAPDH* expression, relative to day 0 control iPSCs. Two-way ANOVA, with Tukey's test for multiple comparisons. There was a non-significant two-way interaction between developmental timepoint and BIBR1532 treatment ( $p > 0.9999$ ); there was a statistically significant main effect of timepoint ( $p < 0.001$ ), but not BIBR1532 treatment ( $p = 0.9998$ ). **(C)** qRT-PCR analysis of *TUBB3* expression throughout MN differentiation, in cells treated with 0.05  $\mu\text{M}$  BIBR1532 or DMSO, normalised over *GAPDH* expression, relative to day 0 control iPSCs. Two-way ANOVA, with Tukey's test for multiple comparisons. There was a non-significant two-way interaction between developmental timepoint and BIBR1532 treatment ( $p = 0.1667$ ); there was a statistically significant main effect of timepoint ( $p < 0.0001$ ), but not BIBR1532 treatment ( $p = 0.1922$ ). **(A–C)** Data presented as mean  $\pm$  S.E.M. 1 experimental block, 3 biological replicates. Datapoints represent biological replicates. From day 7 onwards, an additional technical replicate of the Ctrl 1 line was included in controls, represented as an additional datapoint above. n.s. = non-significant.
